# Supplementary material for: Visualizing Nanoscale Charge Flows in Multi-Dimensional WSe2/GaAs Vertical Diodes
Source: Research Square preprint supplement (doi:10.21203/rs.3.rs-7695608/v1), 2025-10-07
Supplement: Supplementary file 1 [file 4161d7c251c2d3f302178dc5.pdf]

## Supplementary Information

### Visualizing Nanoscale Charge Flows in Multi-Dimensional WSe<sub>2</sub>/GaAs Vertical Diodes

**Michele Zandrini<sup>1</sup>, Claire Blaga<sup>1</sup>, Kamil Artur Wodzislawski<sup>1,2</sup>, Alok Rudra<sup>1,2</sup>, Mitali Banerjee<sup>3</sup>, Anna Fontcuberta i Morral<sup>1,4</sup>, Valerio Piazza<sup>1</sup>**

<sup>1</sup> *Laboratory of Semiconductor Materials, Institute of Materials, Ecole Polytechnique Fédérale de Lausanne (EPFL), 1015 Lausanne, Switzerland*

<sup>2</sup> *Epitaxy Core Facility, Ecole Polytechnique Fédérale de Lausanne (EPFL), 1015 Lausanne, Switzerland*

<sup>3</sup> *Laboratory of Quantum Physics, Topology and Correlations, Institute of Physics, Ecole Polytechnique Fédérale de Lausanne (EPFL), 1015 Lausanne, Switzerland*

<sup>4</sup> *Institute of Physics, Ecole Polytechnique Fédérale de Lausanne (EPFL), 1015 Lausanne, Switzerland*

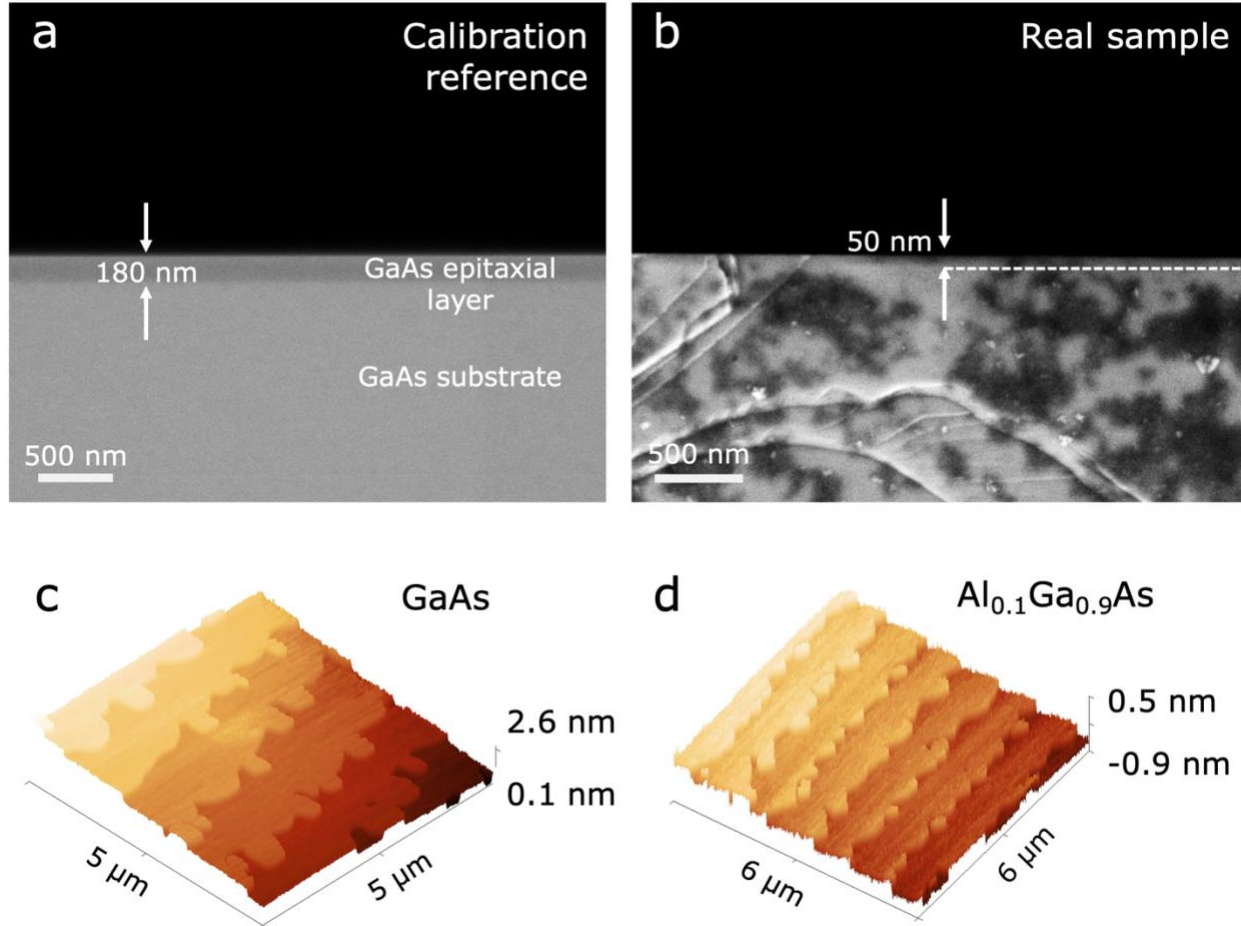

**Supplementary Figure 1:** (a) SEM cross section of the calibration growth for the epitaxial GaAs layer on Zn-doped GaAs (100) substrates; (b) SEM cross section of the final epitaxial layer; 3D AFM maps of epitaxially grown GaAs (c) and AlGaAs (d) layers, showing atomic terraces on the surface.

Planar epitaxial substrates for integration of WSe<sub>2</sub> flakes are grown by MOVPE as detailed in the Methods.

Supplementary Figure 1a shows a cross-section SEM image used for calibrating fluxes and growth time. The SE contrast arising from the difference in doping from the substrate (Zn-doped GaAs) and the intrinsic epitaxial layer allows to measure a thickness of the grown layer around 180 nm. Supplementary Figure 1b shows the cross-section SEM of a thinner layer used for integration. The visible pale contrast allows to measure a layer thickness close to 50 nm.

The surface morphology of the epitaxial layer needs to be atomically smooth to ensure a pristine interface with the WSe<sub>2</sub> flakes. Supplementary Figure 1c shows the 3D AFM map of the epitaxially grown layer, highlighting atomically flat terraces with sub-nm roughness. In a similar manner, Supplementary Figure 1d shows the surface quality of Al<sub>x</sub>Ga<sub>1-x</sub>As layers described in the next sections of this Supporting Information document. As for GaAs, Al<sub>x</sub>Ga<sub>1-x</sub>As epilayers grow with atomically flat surfaces.

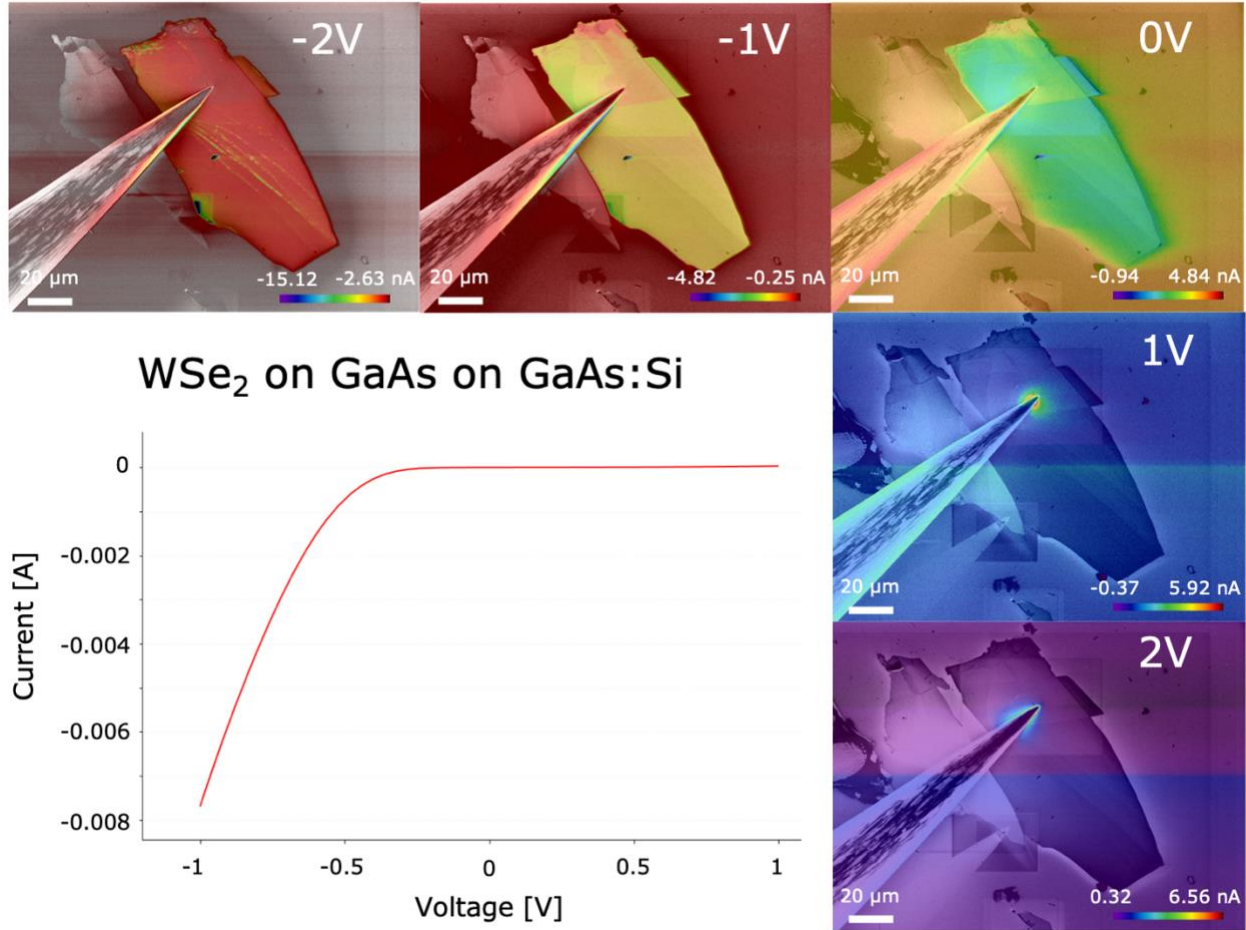

**Supplementary Figure 2:** Voltage series of EBIC maps for WSe<sub>2</sub> flake on top on GaAs:Si substrate, showing no evident sign of current collection from the heterojunction. IV curve obtained upon contacting shows diode-like behavior at negative bias due to the top Schottky contact with the tip.

Supplementary Figure 2 describes in more detail the electrical measurements (EBIC mapping and IV curve) on WSe<sub>2</sub> on epi-GaAs grown on GaAs:Si. As described in the Methods section, all the measurements are carried out connecting the positive pole to the GaAs substrate and the negative pole to the tungsten tip.

IV curve shows a rectifying behavior thus indicating the presence of electrical diode in the circuit. The polarity of the diode is consistent with p-doping in the WSe<sub>2</sub> component or a Schottky contact at the n-WSe<sub>2</sub>/tungsten interface. EBIC maps under reverse bias show no relevant signal. A homogenous current is recorded on WSe<sub>2</sub> as well as on the tungsten tip, indicating that this signal originates from absorption of the primary beam or electron beam absorbed current signal (EBAC). Electrical maps under forward bias reveal the origin of the rectifying element observed in the IV curve. In fact, an intense signal is collected on a very narrow region around the tip, compatible with a Schottky contact. The measurement therefore indicates that WSe<sub>2</sub> is electron-rich.

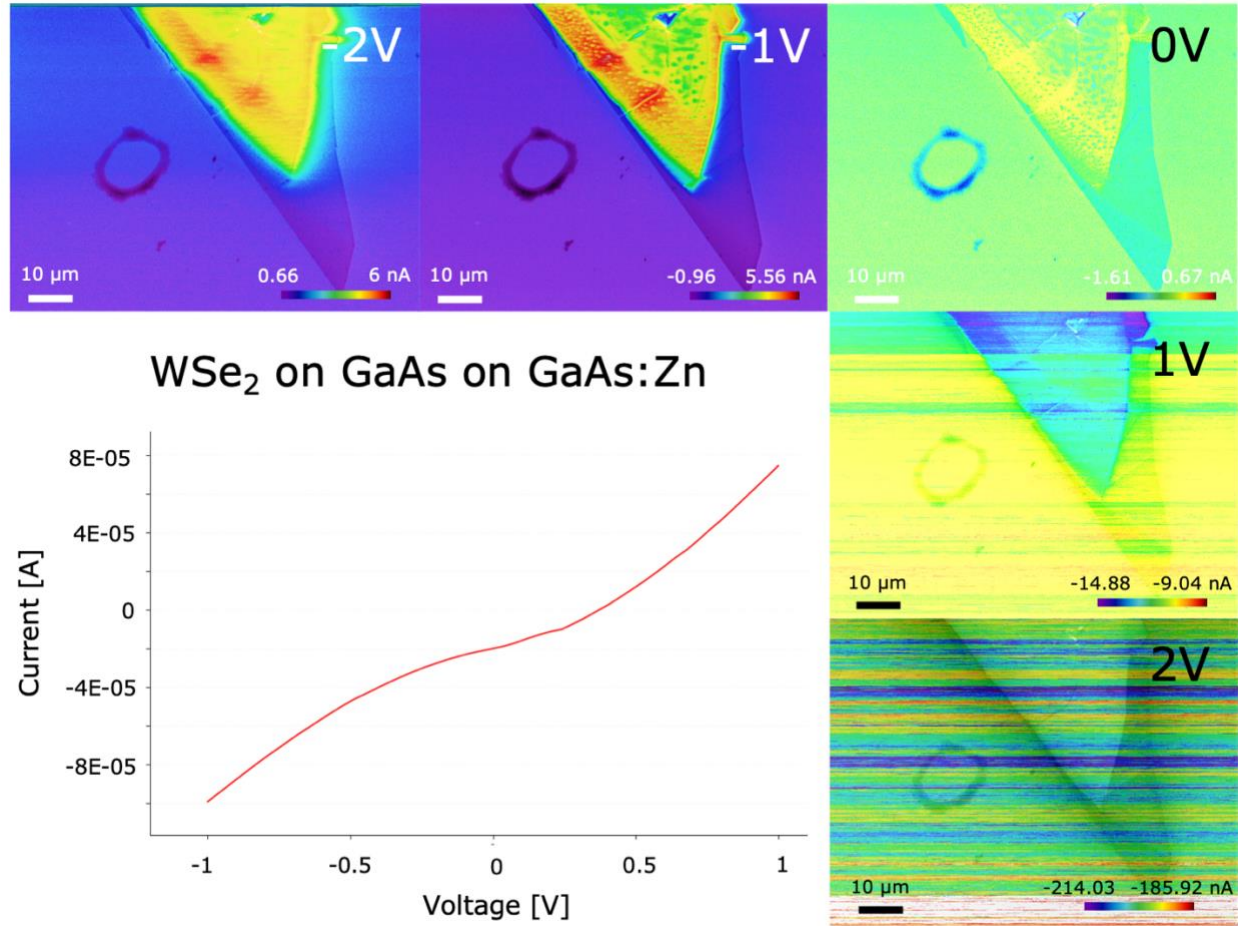

**Supplementary Figure 3:** Voltage series of EBIC maps for WSe<sub>2</sub> flake on top on GaAs:Zn substrate, showing current collection from the heterojunction. IV curve obtained upon contacting shows rectification behaviour thanks to the presence of a built-in field at the heterojunction.

Supplementary Figure 2 describes in more detail the electrical measurements (EBIC mapping and IV curve) on WSe<sub>2</sub> on epi-GaAs grown on GaAs:Si. As described in the Methods section, all the measurements are carried out connecting the positive pole to the GaAs substrate and the negative pole to the tungsten tip.

IV curve shows a rectifying behavior thus indicating the presence of electrical diode in the circuit. The polarity of the diode is consistent with p-doping in the WSe<sub>2</sub> component or a Schottky contact at the n-WSe<sub>2</sub>/tungsten interface. EBIC maps under reverse bias show no relevant signal. A homogenous current is recorded on WSe<sub>2</sub> as well as on the tungsten tip, indicating that this signal originates from absorption of the primary beam or electron beam absorbed current signal (EBAC). Electrical maps under forward bias reveal the origin of the rectifying element observed in the IV curve. In fact, an intense signal is collected on a very narrow region around the tip, compatible with a Schottky contact. The measurement therefore indicates that WSe<sub>2</sub> is electron-rich.



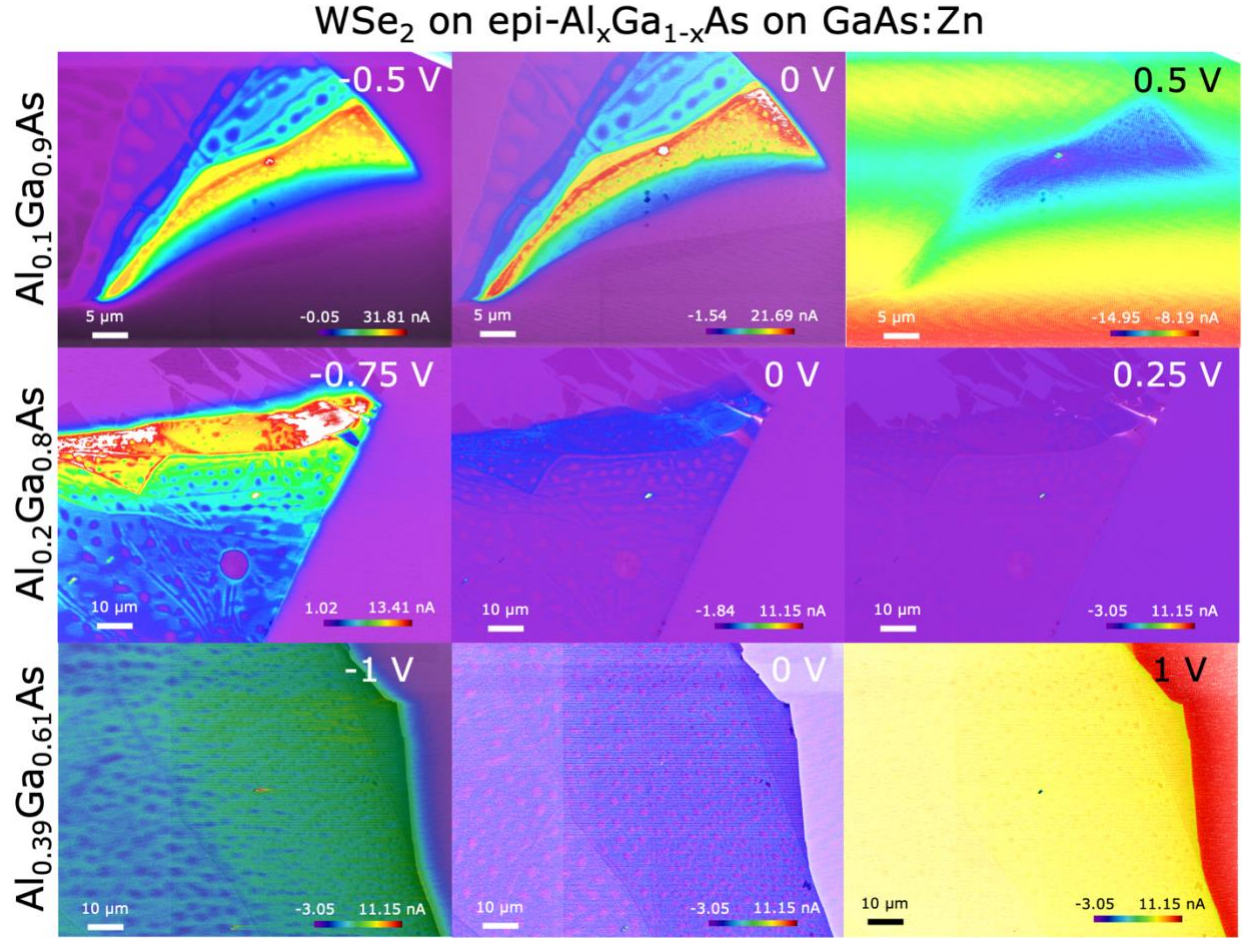

**Supplementary Figure 4:** EBIC maps of different heterojunctions between WSe<sub>2</sub> and Al<sub>x</sub>Ga<sub>1-x</sub>As epilayers at different Al concentration (10%, 20%, 39%, on the rows) at different external biases.

The electrical behavior of the WSe<sub>2</sub>/Al<sub>x</sub>Ga<sub>1-x</sub>As heterojunctions is shown in Supplementary Figure 4. The maps show a consistent trend with what has been described in the main manuscript for WSe<sub>2</sub>/GaAs:Zn heterojunctions, where the presence of the built-in field is driving the current extraction. Equivalent behaviors at different Al concentrations demonstrate how the built-in field is not significantly affected by the band offsets at the junction.

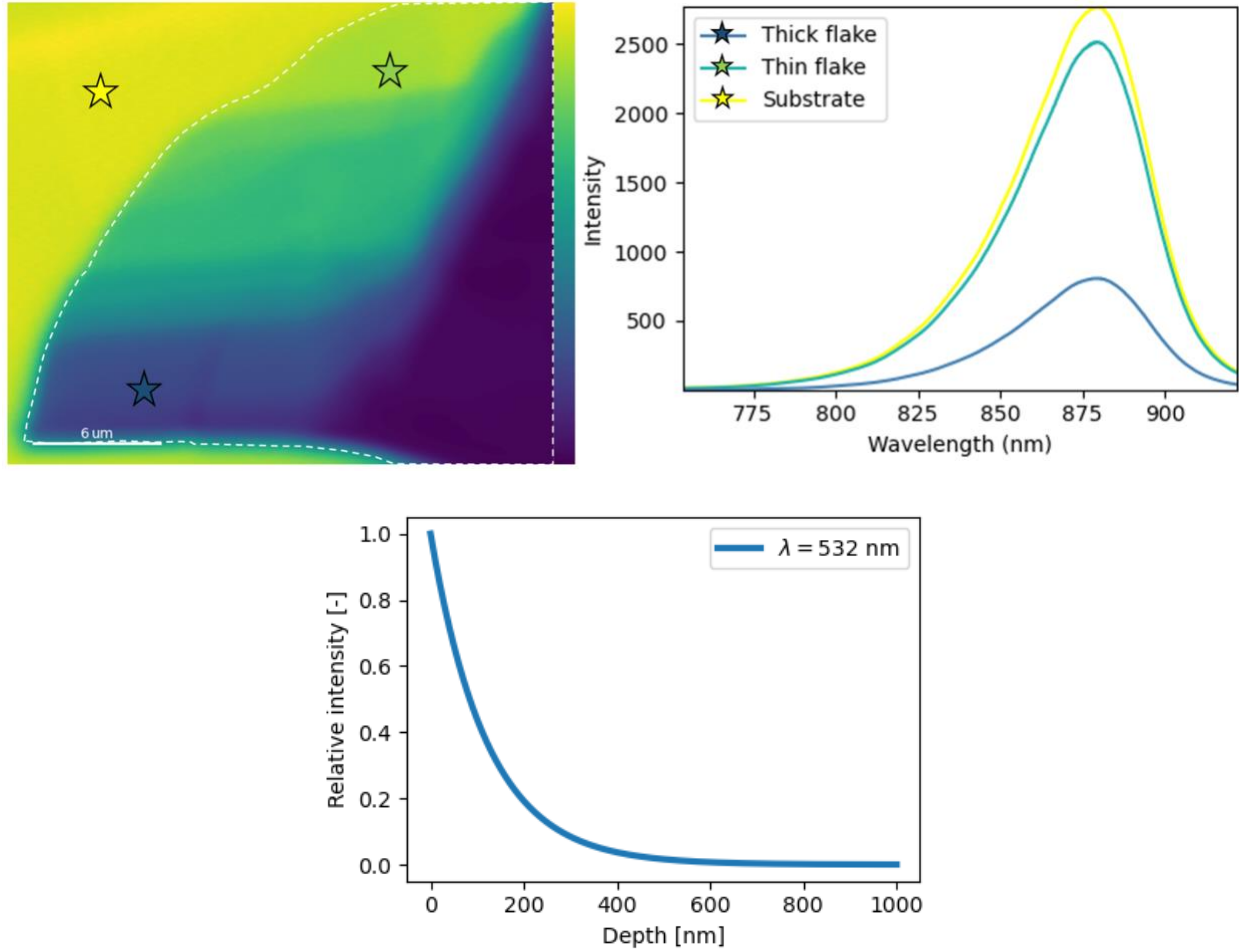

**Supplementary Figure 5:** Photoluminescence (PL) panchromatic map (top left) of a multilayered WSe<sub>2</sub> flake (outlined in dashed white line) on GaAs epilayer (integrated in the range 750 nm – 925 nm). Selected PL spectra (top right) taken on the substrate, on the thin and thick parts of the WSe<sub>2</sub> flake. Decay of 532 nm laser intensity (bottom) with penetration depth in bulk GaAs. Absorption coefficient taken from [1].

In the panchromatic PL map, WSe<sub>2</sub> emission, which would appear as bright areas, is not visible. This indicates that the minimum flake thickness is over two layers (thicknesses at which WSe<sub>2</sub> signal would be visible with the acquisition conditions used). The PL emission comes solely from the GaAs substrate and is partially to totally quenched below the flake, as shown by the decrease in intensity of the PL emission peaks taken beneath the flake. This is due to the latter's laser screening effect. Indeed, penetration in GaAs of the 532 nm laser used for the measurements is well above the 80 nm maximum thickness of the flake.

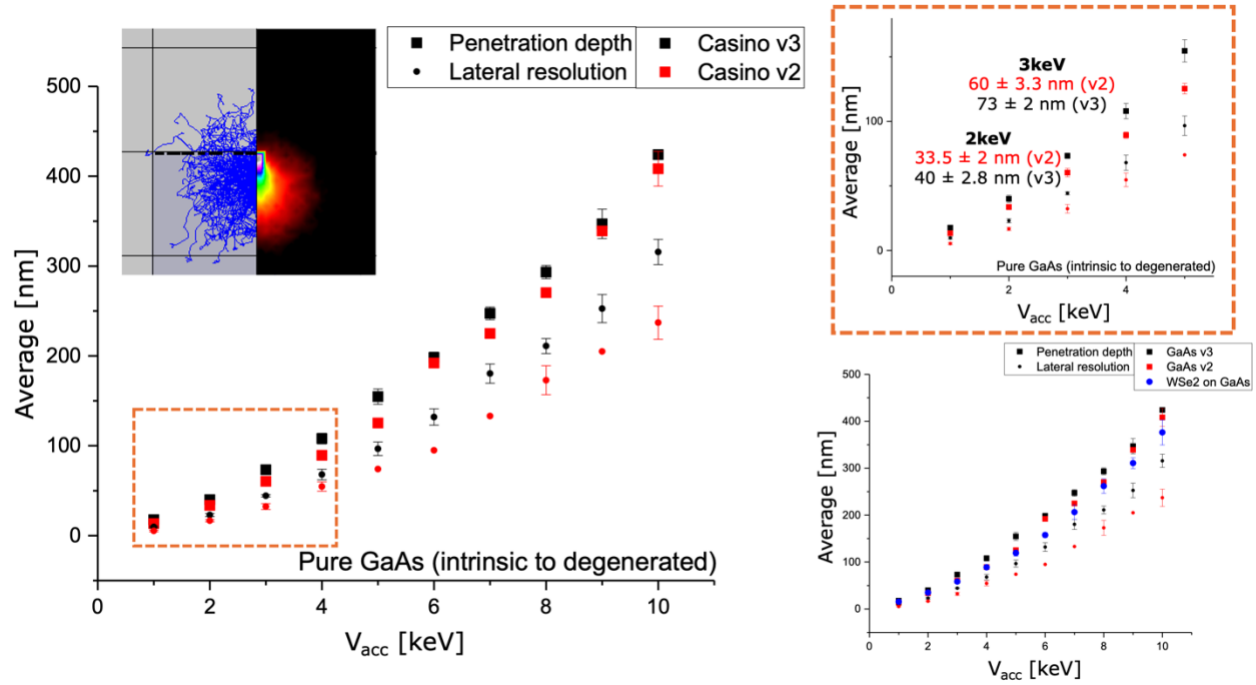

**Supplementary Figure 6:** MonteCarlo simulations of penetration depth of the interaction volume at different acceleration voltages in GaAs. Labels v2 and v3 refer to 2-dimensional and 3-dimensional modeling, showing comparable results with minor differences. Error bars refer to values obtained for different simulations at different doping of the substrate: intrinsic, n-doped at  $10^{17}$ , and n-doped at  $10^{19}$ . Orange inset plot shows zoomed-in version of the major plot with reported values of penetration depth for the acceleration voltages used in our experimental investigations. Bottom right plot overlaps additional simulation results for intrinsic GaAs with overlayer of WSe<sub>2</sub>, with error bars referring to different simulated thicknesses (from 5 to 50 nm).

MonteCarlo simulations with Casino software on pure GaAs. The plot summarizes penetration depth and lateral resolution as a function of primary beam energy. The error bar refers to varying electron concentration (intrinsic,  $10^{17}$  cm<sup>-3</sup>,  $10^{19}$  cm<sup>-3</sup>). Labels v2 and v3 denotes 2D and 3D modeling. Values are extracted by applying a 5% energy cut. The inset in the dashed orange square highlights the relevant values for the experimental conditions of the maps reported in this work. The plot on the right includes values for WSe<sub>2</sub> on intrinsic GaAs (blue points). The error bar refers to WSe<sub>2</sub> thickness (from 5nm to 50 nm).

121

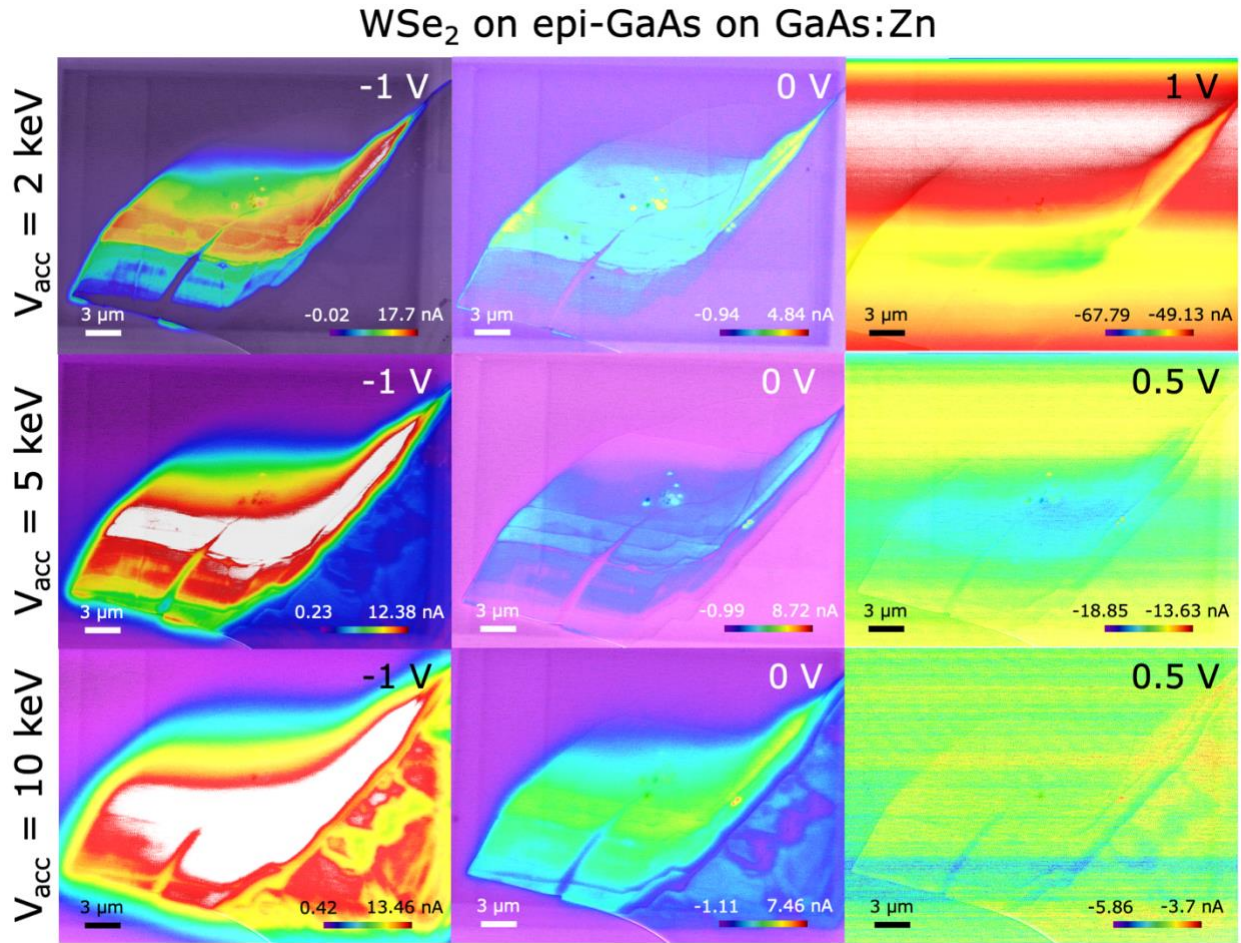

122

123 *Supplementary Figure 7: EBIC maps of WSe<sub>2</sub>/GaAs:Zn heterojunction at different acceleration voltages (2, 5, and*  
 124 *10 keV, on the rows) at different external biases.*

125 Supplementary Figure 7 shows the EBIC maps obtained for the WSe<sub>2</sub>/GaAs:Zn heterojunction at different  
 126 external biases for different acceleration voltages. The external bias evolution is not affected by the  
 127 acceleration voltage, qualitatively remaining the same with morphological features reproduced by current  
 128 profiles in reverse bias. With increasing  $V_{acc}$ , thus penetrating deeper in the substrate, the current collection  
 129 is extended towards thicker regions (see left column evolution with increasing  $V_{acc}$ ). This observation is  
 130 fully consistent with Casino simulations, discussed in the previous paragraph of this Supporting  
 131 Information.

132

133

134



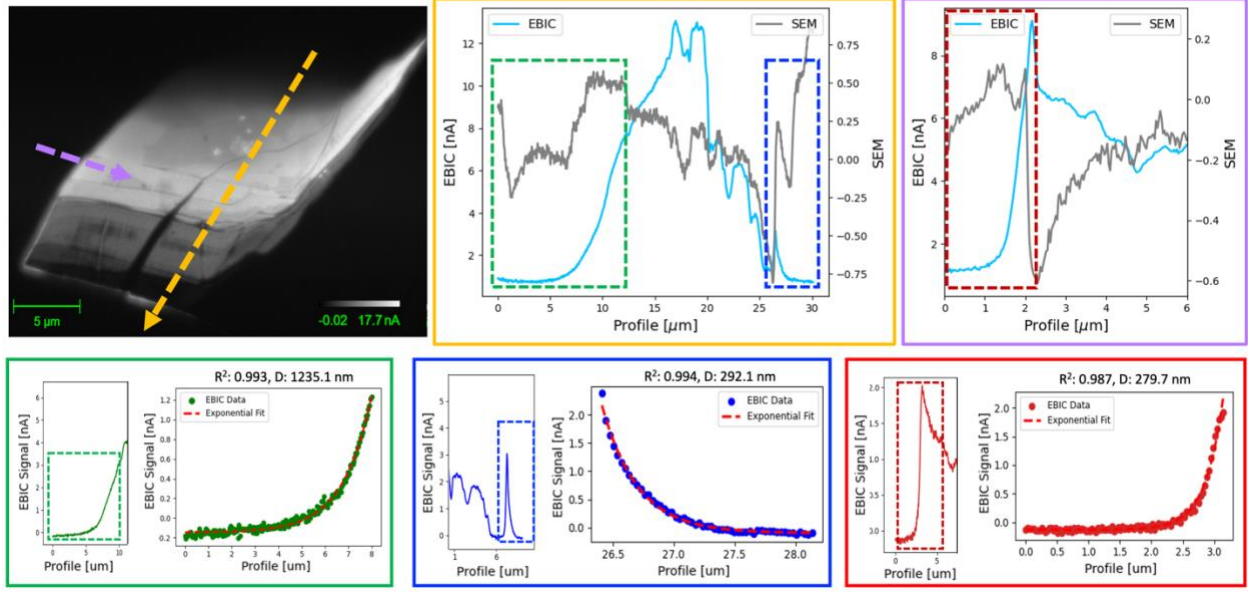

**Supplementary Figure 8:** Diffusion length analysis for 2D/3D WSe<sub>2</sub> on III-V heterojunctions. At the top left, EBIC map of a WSe<sub>2</sub>/epi-GaAs/GaAs:Zn heterostructure with colored arrows representing the two major directions of current profiles extraction for diffusion length estimation: across terraces (yellow) and along terraces (violet). At the top right, superimposed EBIC and SEM profiles extracted along yellow and violet lines, showing correspondence between contrast (morphological) features and current trends. Dashed rectangles refer to fit regions for the curves shown at the bottom, where examples of current profiles are shown, together with the extracted fit parameters.

The diffusion length data extraction and analysis on the 2D/3D WSe<sub>2</sub>/epi-GaAs/GaAs:Zn heterostructures have been performed by manually tracing sets of current profiles on the EBIC maps. These sets are shown in Supplementary Figure 8 with arrows of different colors, representing the heterojunction border at different WSe<sub>2</sub> thicknesses (purple), and the heterojunction profile with varying WSe<sub>2</sub> thickness (yellow). Extracted current profiles are shown in the plots on top, together with dashed insets representing the fitted regions. Profiles as in the green inset provide insight on the hole diffusion length in WSe<sub>2</sub>, being the portion of the flake where drift is not predominant. Profiles in blue provide equivalent information but on a single thickness at the bottom of the flake to account for reliability of the data extraction. The current profiles at the border of the 2D material (red bottom plot) allow for the extraction of GaAs diffusion lengths, from far away from the flake towards the interface.

Diffusion lengths are obtained by selection of portions of the current profiles to be fitted. Cross-correlation of SEM and EBIC signal defines fit boundaries. Data are fitted with exponential profiles, consistently with theoretical expectations from diffusion regimes. R-squared values of the fits are reported here for the examples, generally resulting larger than 0.98 and suggesting reliable match between experimental data and extracted parameters.

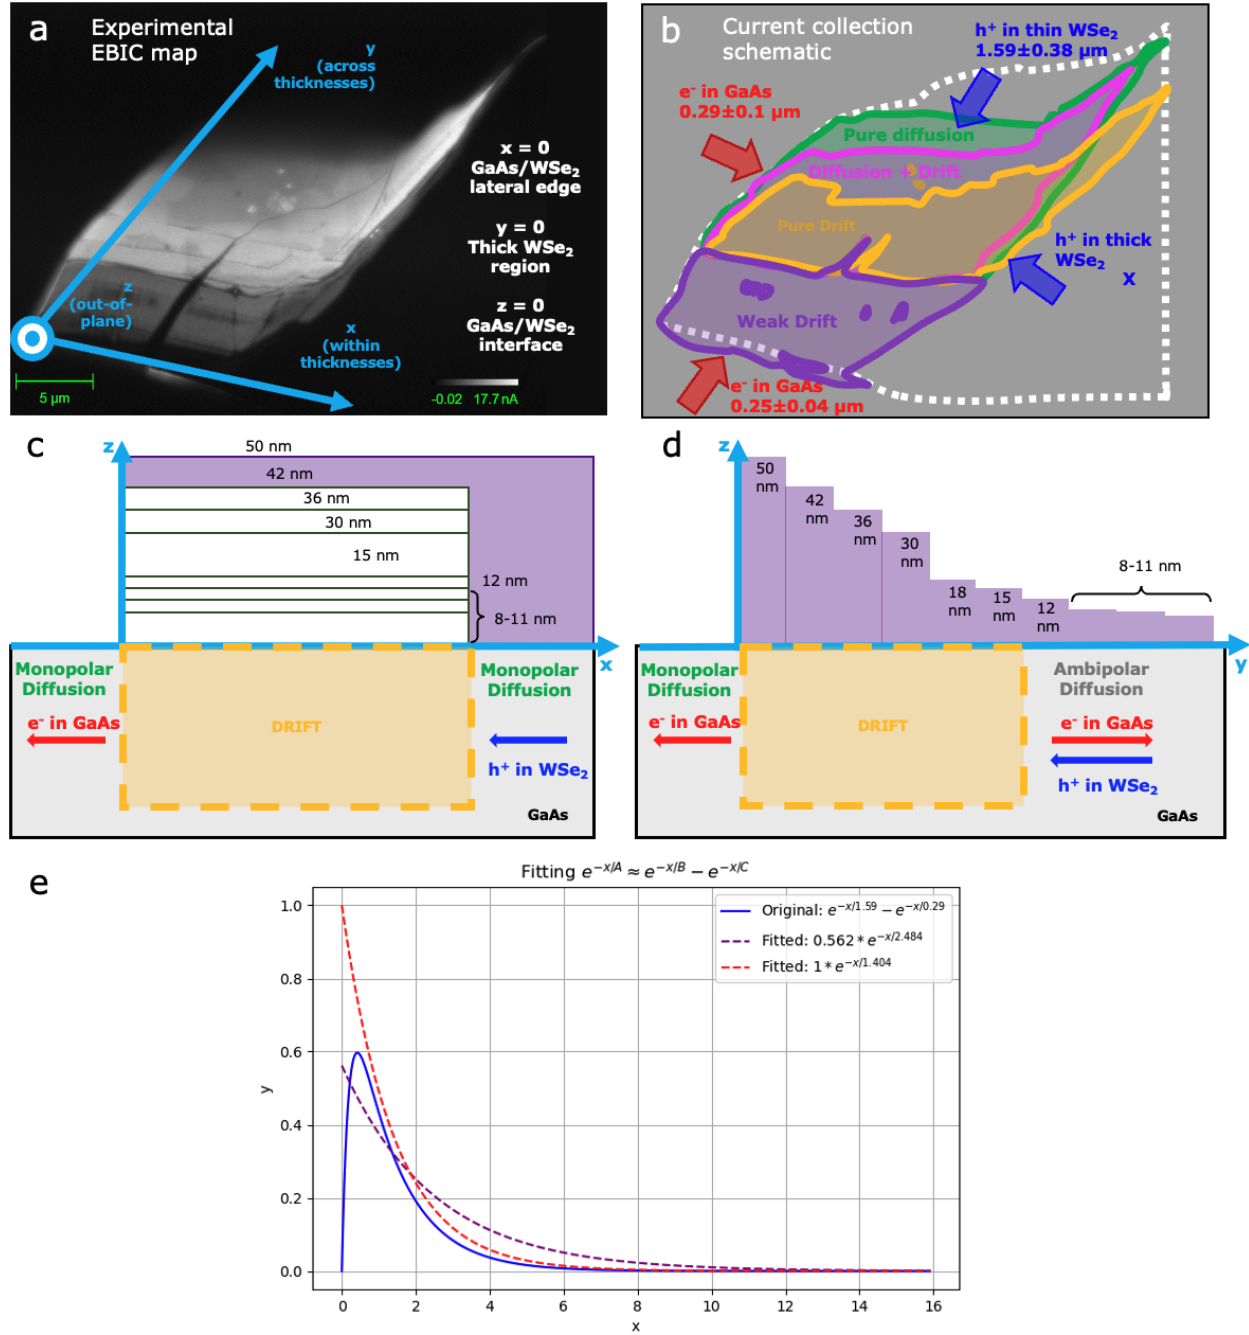

**Supplementary Figure 9:** (a) EBIC experimental map of WSe<sub>2</sub>/GaAs:Zn heterojunction (b) Current collection schematic for different WSe<sub>2</sub> thickness regions; (c) Cross-sectional diagram along a cut on the  $x$ - $z$  plane, showing two monopolar regimes for holes diffusion in WSe<sub>2</sub> and electron diffusion in GaAs; (d) Cross-sectional diagram along a cut on the  $y$ - $z$  plane, showing ambipolar diffusion in thin regions of the WSe<sub>2</sub> flake. (e) Plots of ambipolar diffusion mechanism for the separate regime (blue line) and the fitted ones with estimated values of effective diffusion lengths with (purple dashed) and without (red dashed) pre-exponential fitting.

Supplementary Figure 9 shows a series of diagrams for the diffusion analysis of the 2D/3D WSe<sub>2</sub>/GaAs:Zn heterojunction. The set of coordinates on the EBIC experimental map in panel a are used as reference in the schematics, while panel b shows an overlaid schematic on the equivalent thickness regions for the current collection mechanisms, together with estimated diffusion length values for electrons in GaAs and

holes in WSe<sub>2</sub>. Panels c and d display two cross-sectional diagrams obtained from perpendicular cuts along the x and y directions of the heterojunction in our reference system.

Along x (panel c), monopolar diffusion on both sides can be described, as the interaction volume remains fully in GaAs on the left part (outside the heterojunction) and fully in WSe<sub>2</sub> on the right part where the flake is thick enough. These two regimes allow for the electron diffusion length extraction in GaAs, reading  $290 \pm 101$  nm (as discussed in the main manuscript). On the other side, holes diffusion length in thick WSe<sub>2</sub> was not quantitatively estimated due to insufficient data to extract profiles.

In a similar manner, along y (panel d), monopolar diffusion on the bottom edge can be described with interaction volume fully in GaAs. In this case, electron diffusion length in GaAs extracted from profiles results equal to  $250 \pm 40$  nm. An ambipolar diffusion regimes is found on the top edge of the flakes, where the interaction volume partially lies into thin WSe<sub>2</sub> and partially in GaAs. The effective diffusion length extracted from profiles as discussed in the main manuscript results equal to  $1590 \pm 380$  nm. The ambipolar diffusion regime can be described by the following Equation as in Supplementary Figure 9e:

$$J = A * \exp\left(-\frac{x}{L_{diff}^{eff}}\right) = B * \exp\left(-\frac{x}{L_{diff}^{GaAs}}\right) + C * \exp\left(-\frac{x}{L_{diff}^{WSe2}}\right)$$

If  $A \approx B \approx C$ , one can rewrite:

$$\exp\left(-\frac{x}{L_{diff}^{WSe2}}\right) = \exp\left(-\frac{x}{L_{diff}^{eff}}\right) - \exp\left(-\frac{x}{L_{diff}^{GaAs}}\right)$$

where  $L_{diff}^{eff}$  is defined by the fitting and  $L_{diff}^{GaAs}$  can be deduced by the previous analysis. By using  $L_{diff}^{eff} = 1.59 \pm 0.38$   $\mu\text{m}$  and  $L_{diff}^{GaAs} = 0.29 \pm 0.1$   $\mu\text{m}$ , we find  $L_{diff}^{WSe2} \sim 1.5$   $\mu\text{m}$ , (dashed red curve).

If one assumes  $B \approx C$  instead:

$$\frac{A}{B} * \exp\left(-\frac{x}{L_{diff}^{WSe2}}\right) = \exp\left(-\frac{x}{L_{diff}^{eff}}\right) - \exp\left(-\frac{x}{L_{diff}^{GaAs}}\right)$$

A double parameter fitting returns  $L_{diff}^{WSe2} \sim 2.5$   $\mu\text{m}$  (purple dashed curve).

Although the first assumption offers a better fit, we conservatively indicate a rough value of  $L_{diff}^{WSe2} \sim 2$   $\mu\text{m}$  in the main text.

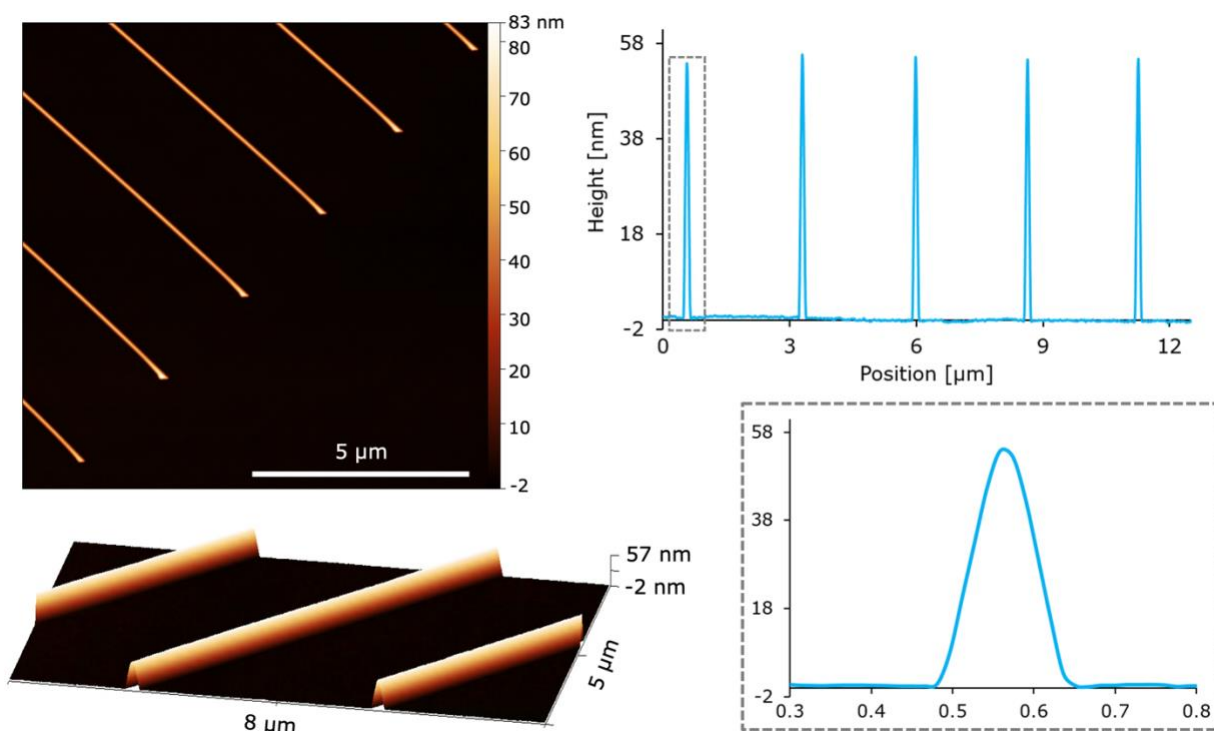

**Supplementary Figure 10:** Morphological characterization of GaAs (100) NMs. On the left, 2D and 3D AFM maps of 1D horizontal NMs, showing perfect selectivity on the SiO<sub>2</sub> mask and reproducible uniformity over the array. On the right, line profiles from the AFM data traced perpendicularly to NMs, highlighting clear homogeneity in height for different structures (55 nm on average). Width of NMs is nominally patterned at 60 nm, but after growth they laterally expand up to 230 nm on average.

Nanostructured substrates are carefully characterized by SEM and AFM to evaluate the nanostructures' quality and dimensions. Supplementary Figure 10 shows the AFM analysis that is generally performed on the substrates prior to integration. The 2D AFM map confirms the absolute selectivity of the epitaxial growth on the specific array for integration, with flawless NMs and no trace of parasitic growth. This aspect is also generally assessed and verified by SEM on larger scale on the whole growth sample. The 3D AFM outline shows the morphology of NMs growing on GaAs (100) substrates. As demonstrated in detail in previous studies [2,3], NMs evolve outside the SiO<sub>2</sub> mask with a pyramidal cross-section, truncated at medium growth stages, towards completion at final ones, as in Supplementary Figure 10 and in general in the substrates we used for integrations. The AFM profiles highlight the ideal reproducibility of the NMs within a single array, with height deviations of  $\pm 1$  nm for heights of tens of nanometers. Finally, the inset profile at the bottom shows once again the cross-sectional profile of the NMs more in detail, evidencing the lateral size of the structures being as large as 200 nm. The nominally patterned width of the NMs, equal to 60 nm in our case, enlarges not only due to slight electron beam overexposure, but also because of natural growth mode of these nanostructures. Lateral overgrowth over the mask happens at first growth stages, while progressive cross-sectional expansion occurs upon completion of the pyramid [2].



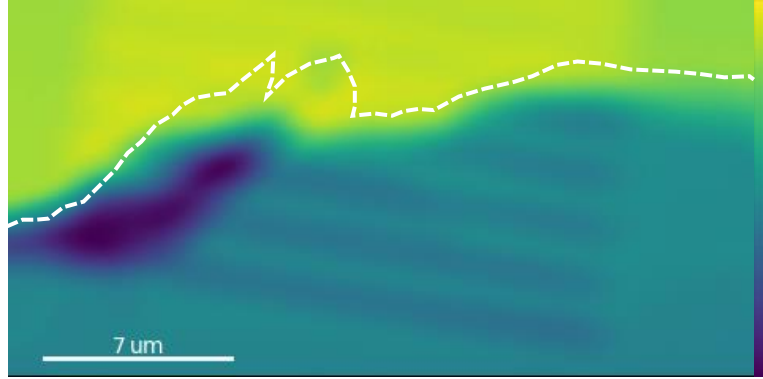

**Supplementary Figure 11:** PL map of the WSe<sub>2</sub> flake (outlined in dashed white line) transferred on GaAs NMs, integrated in the GaAs emission range 850 nm – 900 nm.

Supplementary Figure 11 shows the map of the GaAs PL intensity of a sample consisting of a WSe<sub>2</sub> flake on GaAs NMs. The flake is outlined in a dashed white line. It can be seen that the GaAs emission intensity is reduced by the presence of the flake (area under the white line), with thicker regions of the flake appearing darker. This is due to the WSe<sub>2</sub> flake screening the laser intensity and thus lowering the excitation power on the substrate below. Furthermore, outside of the flake region (above the white line), it can be observed that the bare NMs have a stronger emission than the surrounding substrate. However, the NMs covered by the WSe<sub>2</sub> show lower emission compared to the surrounding substrate under the flake. This indicates a change in the recombination process of the photogenerated charge carriers confined to the areas where the GaAs NMs are in contact with the WSe<sub>2</sub>. In these 1D heterojunction regions, the presence of a built-in-field leads to charge separation of the photogenerated carriers and therefore, partial quenching of the photoluminescence. This phenomenon is absent in the surroundings of the NMs due to the presence of the SiO<sub>2</sub> mask.

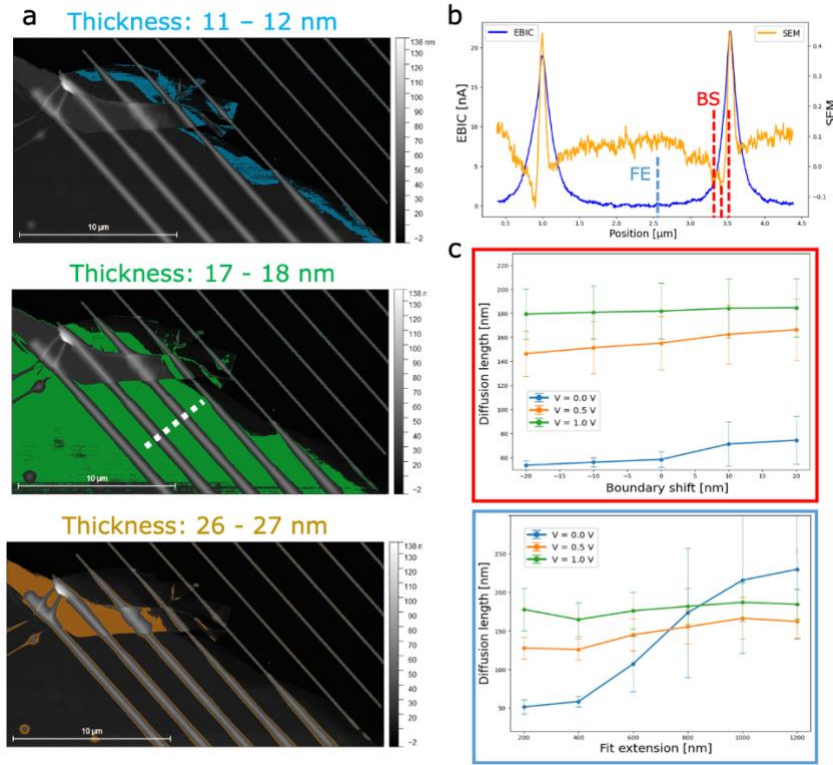

**Supplementary Figure 12:** Diffusion length analysis for 2D/1D TMDs/III-V heterojunctions. (a) AFM maps with different height mask for flake thicknesses identification; (b) Current (EBIC) and contrast (SEM) superimposed profiles taken along the white line in panel (a), showing clear match between electrical and morphological features, together with a schematic of the fundamental fit parameters, namely boundary shift (BS) and fit extension (FE); (c) Diffusion length data extracted from the same fitted profile at different voltages and different boundary shifts (in red contour) and fit extensions (in blue contour), highlighting marked reproducibility at different choice of boundary parameters. Error bars are standard deviations referred to the different profiles at different positions.

AFM data of WSe<sub>2</sub> on GaAs nanomembranes are masked at different height levels to define flake single-thickness regions (Supplementary Figure 12a). WSe<sub>2</sub> diffusion lengths for different thicknesses are estimated through current profiles thanks to well-defined interfaces between NMs and each WSe<sub>2</sub> thickness. Supplementary Figure 12b shows the superimposed profiles of SEM contrast and EBIC signal along the white line on the central map of the panel a. Morphological-electrical correspondence evidences electrical signal only coming from regions where the 2D/1D interface is present. A Python script is hence developed to analyze the superimposition of the morphological and current profiles and define boundaries for fitting regions. Lateral borders of the NMs are identified (first two neighboring minima to the morphological maxima), defining theoretical onsets of diffusion regimes. However, pixelization and slight misalignment of the two different signals can cause mismatch of the morphological minimum with respect to the real interface borders. For this reason, a boundary shift (BS) parameter is assigned to discrete displacements of the fitting border. Similarly, a fit extension (FE) parameter is defined to account for possible variabilities when expanding or compressing the fit region. An upper limit for this parameter is set at half the pitch to avoid contributions from neighboring NMs. Supplementary Figure 12c shows the results for BS (red) and FE (blue), showing hole diffusion lengths in 17-18 nm thick WSe<sub>2</sub> at different voltages. The slight variation of diffusion length with BS reveals little impact of this parameter in the considered range. FE only has a significant influence at low/absent external bias (e.g blue curve), due to reduced fit accuracy in wide data

ranges when decreasing signal-to-noise ratio. This discrepancy was also accompanied by a marked decrease in the fit quality parameter.

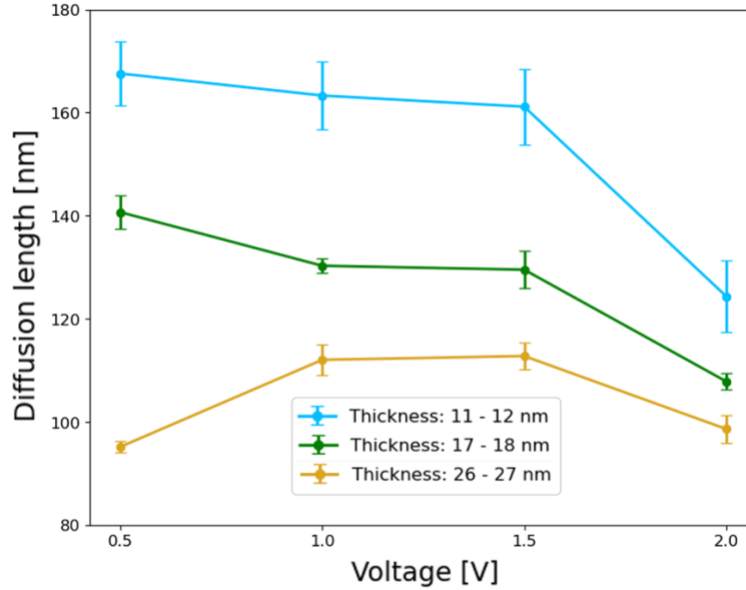

**Supplementary Figure 13:** Diffusion length extracted values for different thicknesses at different voltages, showing clear thickness dependence and weak voltage dependence.

Supplementary Figure 13 presents an example of diffusion lengths extracted for the different thicknesses under various applied voltages, for the specific integrations whose AFM maps are presented in Supplementary Figure 12. The fitting approach allowed to extract a statistically reliable set of data, considering that for each thickness several profiles are extracted, where geometrically possible thanks to the heterostructure shape. Each profile enclosed the maximum number of nanostructures covered by the 2D material at that thickness. For each covered NM in the profile, the two branches of the current profiles at the sides of the nanostructure are fitted to extract diffusion values. Diffusion length values are calculated for 5 different boundary shifts, in the range of  $\pm 2$  pixels from the identified minimum. A fit extension equal to 1  $\mu\text{m}$  is chosen to include as many data as possible, apart from low voltage cases where it is reduced to 600-800 nm to increase the fit quality. All these values are averaged together to obtain one single diffusion length for each profile. All the values from different profiles at a certain thickness are averaged to obtain a single diffusion length, representative to one thickness under one specific applied bias. Error bars refer to the variability among profiles for each thickness. This analysis is repeated for each applied voltage. The same approach is consistently applied to other integrations of WSe<sub>2</sub> flakes on GaAs NMs to obtain the full set of comparable data. Discussion of these trends is presented in the main manuscript.

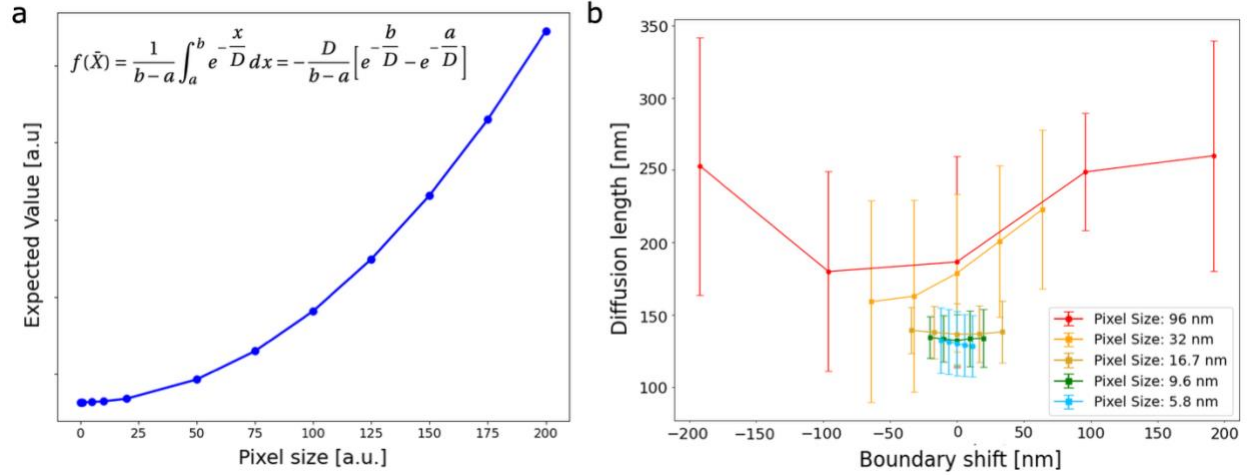

**Supplementary Figure 14:** Magnification effect on diffusion length estimation. (a) Trend of the expected value of an exponential function with increasing discretization (e.g. pixel size), as described by mean value theorem in the inset equation; (b) Estimated values of diffusion length for a magnification series on a heterojunction of WSe<sub>2</sub> on GaAs NMs at a fixed voltage and flake thickness, showing how the same profile gives pixel size dependent diffusion length values, saturating when pixel size becomes small enough.

When extracting current profiles, the pixel size of the experimental map plays a role in determining the curve resolution, translating into possible artifacts when trying to fit the curves. The reason for this behaviour is presented in Supplementary Figure 14a: increasing the pixel size is equivalent to averaging the real current profile on larger discretized intervals of the trend. For an exponential function, this turns into larger expected values in the measured profiles than what it should be if the resolution was higher, as analytically described by the mean integral value theorem. When this happens, the characteristic length scale of fitting exponentials hence increases, as presented in Supplementary Figure 14b. Extracted diffusion lengths are plotted for acquisitions at different magnifications of the same WSe<sub>2</sub>/GaAs-NMs heterojunction. Even if the external bias is fixed, the injection conditions are the same, and the profiles are extracted at the same location in different acquisitions, the extracted diffusion length markedly decreases when reducing the pixel size. The diffusion length values saturate around a certain final value (in this case around 130 nm) when the pixel size is small enough. The diffusion length is a material parameter that should not be influenced at all by the scale of investigation. As shown by the graph, and more in general for other cases that we cross-checked, extracted values from the fits resulted overall constant once the pixel size was roughly 10 times smaller than the diffusion lengths themselves.



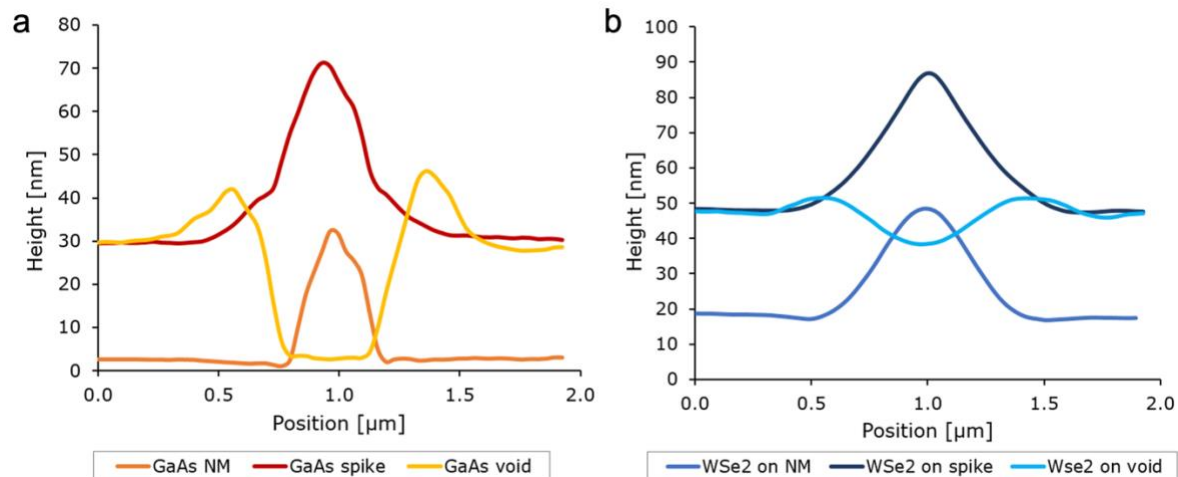

**Supplementary Figure 15:** Morphological characterization of NXs and WSe<sub>2</sub> on NXs. (a) AFM height profiles of the NM constituting the branch of a NX, of the spike at the center of the NX, and of the void between different NXs; (b) AFM height profiles of the WSe<sub>2</sub> flake in its central region of constant thickness on top of the NM, on top of the spike at the center of the NXs, and floating on top of the central void between NXs.

The NXs network consists of parallel and perpendicular linear nanostructures partially intersected. Intersections result in the growth of localized spikes with average base diameter of 850 nm (red curve) while disconnected areas appear as 530 nm wide voids reaching down the SiO<sub>2</sub> mask (yellow curve), as shown by the profiles in Supplementary Figure 15a. Similar profiles for the flake on top of NXs are presented in Supplementary Figure 15b, highlighting conformality of the 2D material on top of the spikes (dark blue curve) and evident suspension at disconnected regions in between NXs (light blue curve).

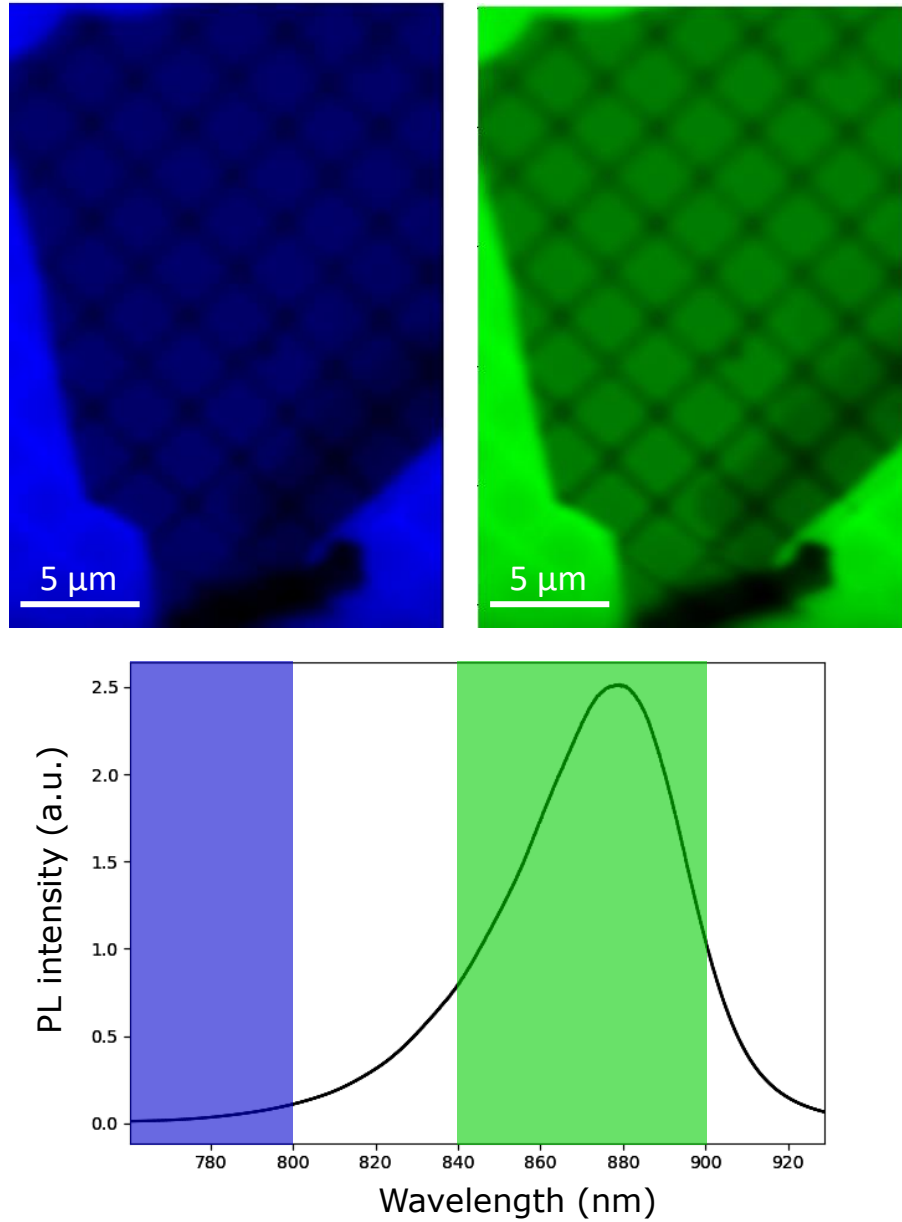

**Supplementary Figure 16:** Hyperspectral maps of a WSe<sub>2</sub> flake on GaAs NXs integrated in the WSe<sub>2</sub> range, between 760 nm and 800 nm (left) and the GaAs range, between 840 nm and 900 nm (right), as shown in the spectrum cumulated over all pixels of the map, shown below.

The absence of bright emission areas from the PL hyperspectral map integrated in the WSe<sub>2</sub> wavelength range (760 nm to 800 nm) on Supplementary Figure 16 (top left), as well as the similarity with the map integrated in the GaAs range (840 nm to 900 nm) on Supplementary Figure 16 (top right) confirms the absence of a WSe<sub>2</sub> monolayer. The PL contribution in the WSe<sub>2</sub> wavelength range comes entirely from the tail of the GaAs emission.

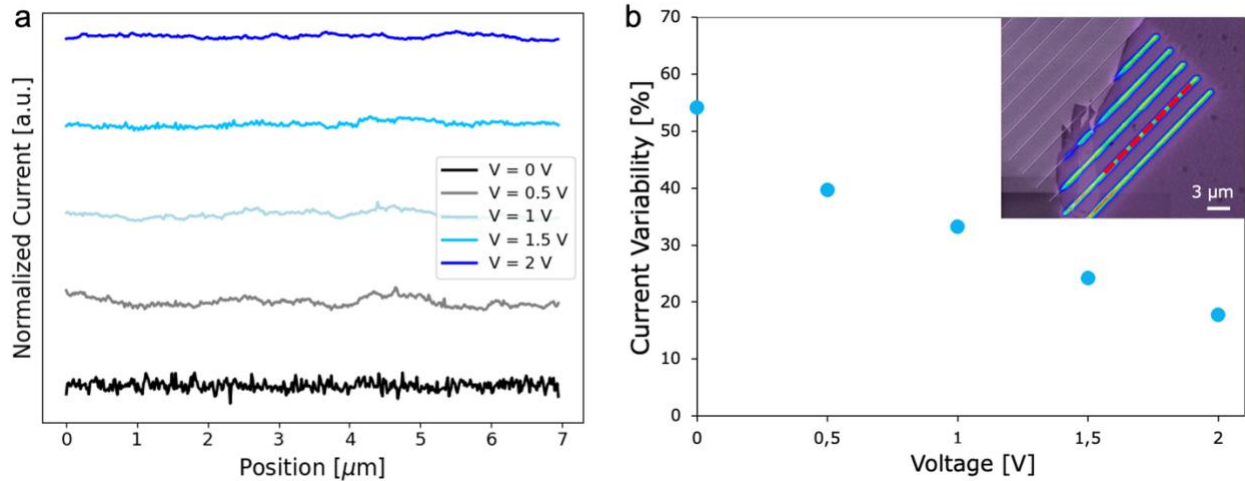

**Supplementary Figure 17: Current variability at different bias.** (a) Normalized current profiles along the interface between  $\text{WSe}_2$  and GaAs NMs at different biases, showing increased reproducibility when increasing external voltage; (b) Percentage current variability decreasing with external bias at the  $\text{WSe}_2/\text{GaAs}$  NMs interface, proving signal stabilization with increasing external voltage. Top right inset shows the experimental EBIC map from which profiles are extracted along the red dashed curve at different voltages.

Current values differ under various applied voltage, increasing significantly at larger bias. This trend is shown in Supplementary Figure 17a, for current profiles extracted longitudinally on top of the 2D/1D heterojunction, as the red dashed curve of the inset of Supplementary Figure 17b. At low voltages, EBIC signal-to-noise ratio decreases, causing current fluctuations that drop from more than 50% at 0.0V to less than 20% at 2.0V, as presented by the plot in Supplementary Figure 17b.

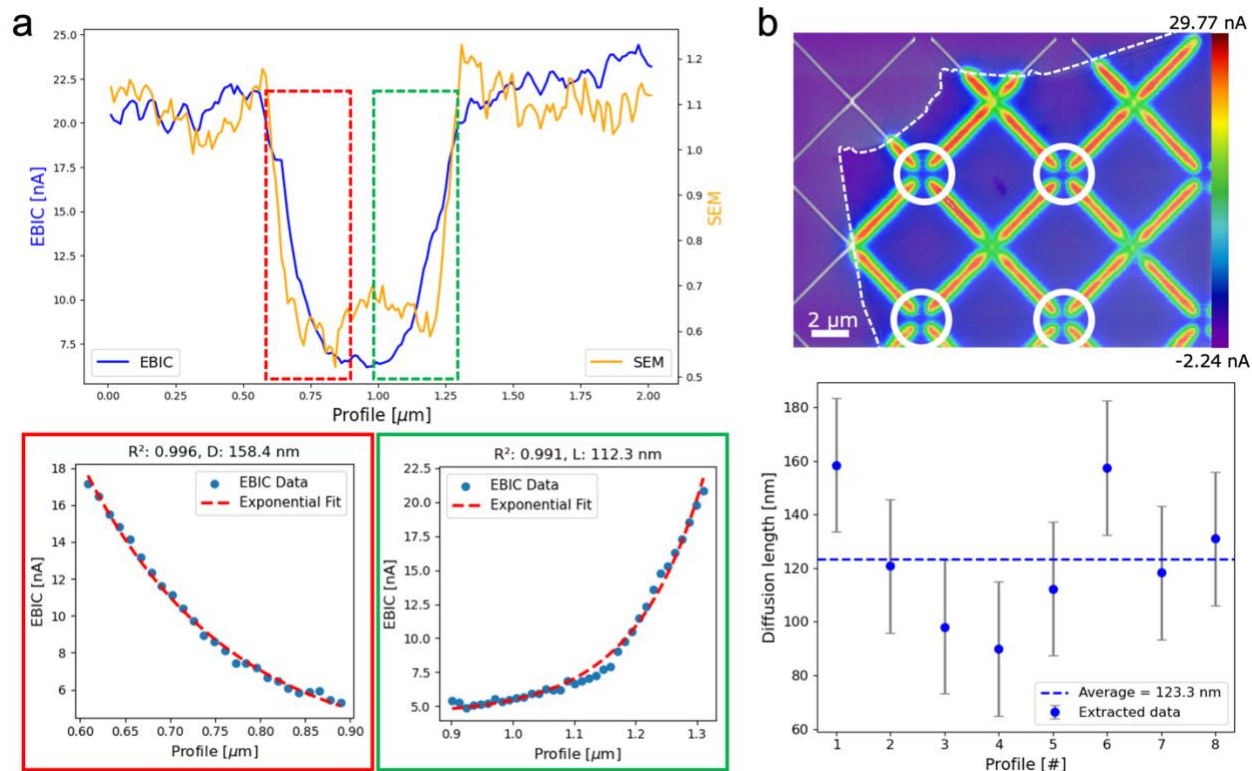

**Supplementary Figure 18:** Diffusion length analysis for NXs. (a) Superimposed SEM and EBIC signal in correspondence of the void between NXs. Overlaid dashed rectangles highlight regions for the fitted portions of the EBIC signal, as shown in the respective insets below the plot. (b) Extracted diffusion length values (in the bottom plot) for different profiles traced at the locations indicated by white circles in the EBIC map on top.

The diffusion length analysis for WSe<sub>2</sub> on GaAs NXs is performed analogously to the previous integrations. Here, void regions in between NXs where no WSe<sub>2</sub>/GaAs interface is present allow for hole diffusion length estimation in WSe<sub>2</sub>. Supplementary Figure 18a shows superimposed SEM and EBIC signals where fitting regions are highlighted by dashed curves in red and green. Consistently, the two subplots at the bottom show the fitted exponentials with highly reliable fit quality. Diffusion length values for this heterointegration are averaged among various profiles obtained from multiple void locations, when possible. Supplementary Figure 18b shows the magnified EBIC map where such locations are highlighted by white circles. The plot at the bottom shows extracted diffusion length values from different profiles, where the dashed line the average value and the error bars represent the standard deviation. Discrepancies in extracted diffusion length values could be ascribed to different morphological relaxations of the flake in the void regions.



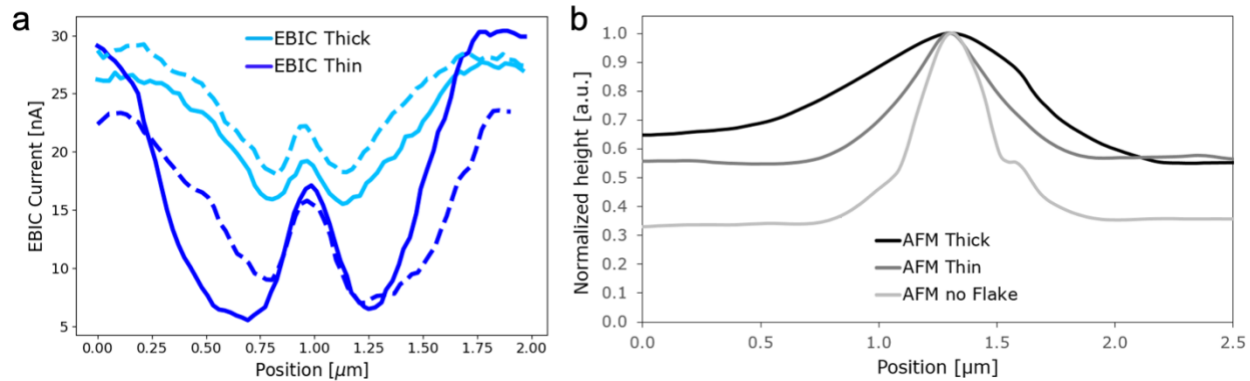

**Supplementary Figure 19:** Current and morphological behavior at the spikes. (a) EBIC current profiles on the thin (19 nm) and thick (37 nm) homogeneous portions of the  $\text{WSe}_2$  flake on top of the central spike in the NXs. Solid curves refer to the  $\langle 001 \rangle$  direction, while dashed ones to the perpendicular  $\langle 010 \rangle$  one. (b) AFM normalized heights of the bare spike, thin flake and thick flake on top, showing different conformality depending on the thickness.

The presence of a central area of contact is expected to lead to localized current collection, as indeed shown in Supplementary Figure 19a. EBIC profiles at the spike location reveal the presence of current peaks at the central position as expected. The current profiles extracted along perpendicular directions (filled and dashed curves of same color) on both flake thicknesses show marked reproducibility. Taller structures could improve the in-plane confinement but would also impact the strain distribution and could increase the chance of destructive events such as piercing [4]. Thicker regions instead appear to result in stronger confinement (blue curve of Supplementary Figure 19a), most likely due to a reduced lateral adhesion of stiffer flakes. AFM profiles in Supplementary Figure 19b indeed show different conformality at different thicknesses.

## References

1. Papatryfonos, K. *et al.* Refractive indices of MBE-grown  $\text{Al}_x\text{Ga}_{(1-x)}\text{As}$  ternary alloys in the transparent wavelength region. *AIP Advances* **11**, 025327 (2021).
2. Morgan, N. *et al.* From Layer-by-Layer Growth to Nanoridge Formation: Selective Area Epitaxy of GaAs by MOVPE. *Crystal Growth & Design* **23**, 5083–5092 (2023).
3. Dede, D. *et al.* Selective area epitaxy of GaAs: the unintuitive role of feature size and pitch. *Nanotechnology* **33**, 485604 (2022).
4. Balgarkashi, A. *et al.* Spatial modulation of vibrational and luminescence properties of monolayer  $\text{MoS}_2$  using a GaAs nanowire array. *IEEE Journal of Quantum Electronics* **58**(4), 1–8 (2022).
